# Supplementary material
Source: Royal Society of Chemistry journal article supplement (doi:10.1039/d6nr00142d)
Supplement: d6nr00142d1.pdf [file d6nr00142d1.pdf]

## Supporting Information:

### **Study of antimicrobial effects of laser-engineered SERS-active Cu@Cu<sub>2</sub>O nanostructures and their compatibility with human embryonic kidney cells**

Jyotsna Patra,<sup>a</sup> Govind Chouhan,<sup>b</sup> Pratyush Dash,<sup>a</sup> Manika Dandapat,<sup>a</sup> Satyaranjan Satyajit,<sup>a</sup> Umakanta Tripathy,<sup>a</sup> Sheeja Jagadevan,<sup>b</sup> and Amitava Adak\*<sup>a</sup>

---

<sup>a</sup> Department of Physics, Indian Institute of Technology (Indian School of Mines) Dhanbad-826004, Jharkhand, India. Email: amitavaadak@iitism.ac.in (A. Adak)

<sup>b</sup> Department of Environmental Science and Engineering, Indian Institute of Technology (Indian School of Mines) Dhanbad-826004, Jharkhand, India.

## 1 Reported works on antibacterial activity using Cu or Cu-based nanoparticles

Table S1 A summary of antibacterial activity using Cu or Cu-based nanoparticles (NPs)

| references                     | Nano-particle                                        | fabrication method, particle size & structure                                                                    | bacterial strain                       | Normal cell line                    | remarks                                                                                                                                                             |
|--------------------------------|------------------------------------------------------|------------------------------------------------------------------------------------------------------------------|----------------------------------------|-------------------------------------|---------------------------------------------------------------------------------------------------------------------------------------------------------------------|
| Shiravand et al., <sup>1</sup> | Cu NPs                                               | Green synthesis route. Avg. particle size: 22.3 nm                                                               | <i>E.coli</i> , <i>S aureus</i> , etc. | normal human peripheral blood cells | Showed good viability but antibacterial activity at low concentrations (< 100 ug/mL) is absent.                                                                     |
| Chen et al., <sup>2</sup>      | Cu@Ag                                                | Chemical reaction method, spherical core-shell nanoparticles                                                     | <i>E.coli</i> and <i>S. aureus</i>     | NA                                  | Shown antibacterial activity but cytotoxicity against normal cells is absent.                                                                                       |
| Dobrucka et al., <sup>3</sup>  | Cu@Pt                                                | Biogenically synthesized by agrimoniae herba extract, particle size 30 nm                                        | Various bacterial strain               | NA                                  | Showed various degrees of activity against bacterial strain. cytotoxicity against normal cells is absent                                                            |
| Sun et al., <sup>4</sup>       | Carbon nanosheet decorated with Cu@Cu <sub>2</sub> O | Hydrothermal method, Cu@Cu <sub>2</sub> O particle size in the range 10.5-13.5 nm on 5 nm thick carbon nanosheet | <i>E.coli</i> and <i>S. aureus</i>     | NA                                  | Showed excellent antibacterial activity but at large concentrations(125-1000 ug/mL). Also, biocompatibility is not evaluated.                                       |
| Our work                       | Cu@Cu <sub>2</sub> O                                 | Pulsed laser ablation (PLA) in deionized water, core-shell nanoparticle of size: ~ 5.6 nm                        | <i>E.coli</i> and <i>B. pumilus</i>    | Human embryonic kidney (HEK-293)    | Shows excellent antibacterial activity against both the bacterial strains at a nanoparticle concentration as low as 5 ug/mL and highly biocompatible upto 25 ug/mL. |

## 2 Quantitative measurements of antibacterial performance of Cu@Cu<sub>2</sub>O NPs

Table S2 % Inhibition and log reduction calculated at different concentration of Cu@Cu<sub>2</sub>O against *E.coli* and *B.pumilus*. All the experiments were performed in triplicate.

| NPs Concentration | % Inhibition            |                         | Log reduction           |                         |
|-------------------|-------------------------|-------------------------|-------------------------|-------------------------|
|                   | <i>Escherichia coli</i> | <i>Bacillus pumilus</i> | <i>Escherichia coli</i> | <i>Bacillus pumilus</i> |
| C1: 100 µg/mL     | 99.97 ± 0.01            | 99.98 ± 0.03            | 3.52 ± 0.17             | 3.31*                   |
| C2: 75 µg/mL      | 98.18 ± 0.38            | 99.68 ± 0.09            | 1.75 ± 0.09             | 2.51 ± 0.13             |
| C3: 50 µg/mL      | 95.14 ± 0.77            | 99.47 ± 0.17            | 1.32 ± 0.07             | 2.29 ± 0.14             |
| C4: 25 µg/mL      | 91.50 ± 1.57            | 96.77 ± 0.42            | 1.08 ± 0.08             | 1.49 ± 0.06             |
| C5: 5 µg/mL       | 87.61 ± 4.20            | 90.00 ± 0.57            | 0.92 ± 0.14             | 1.00 ± 0.03             |

\*In case of *Bacillus pumilus*, with NPs concentration 100 µg/mL, non-zero colony count was found only once were the log reduction could be defined. Hence, error could not be estimated for this case.

### 3 cell viability (at 24 hr) due to the influence of Cu@Cu<sub>2</sub>O NPs performed on HEK-293 cell lines

Table S3 Quantitative details of cell viability and % inhibition at 24 hour

| NPs Conc. | Abs.(mean) | Abs. (STD) | % Cell Viability (mean) | % Cell Viability (STD) | % inhibition |
|-----------|------------|------------|-------------------------|------------------------|--------------|
| 5         | 1.1        | 0.2        | 90                      | 15                     | 9            |
| 25        | 1.02       | 0.05       | 84                      | 4                      | 15           |
| 50        | 0.6        | 0.1        | 52                      | 11                     | 47           |
| 75        | 0.24       | 0.06       | 19                      | 4                      | 80           |
| 150       | 0.026      | 0.004      | 2.2                     | 0.4                    | 97           |

\* All the experiments were performed in triplicates

### 4 FFT analysis from TEM images

The FFT analysis is performed on the fringe patterns found in HRTEM images using imageJ software. For this, an HRTEM image (as shown in Figure S1 (a, e and i)) with clear fringe pattern (see Figure S1 (b,f and j)) is chosen. FFT image is generated for a selected area of the image with clear fringe pattern. From the FFT (see Figure S1 (c, g and k)), a distinct frequency component (corresponding to the fringe), as indicated by yellow arrow, is chosen to generate a clear IFFT image. The d-spacing is measured from this high contrast IFFT image by taking line-out across the fringe pattern.

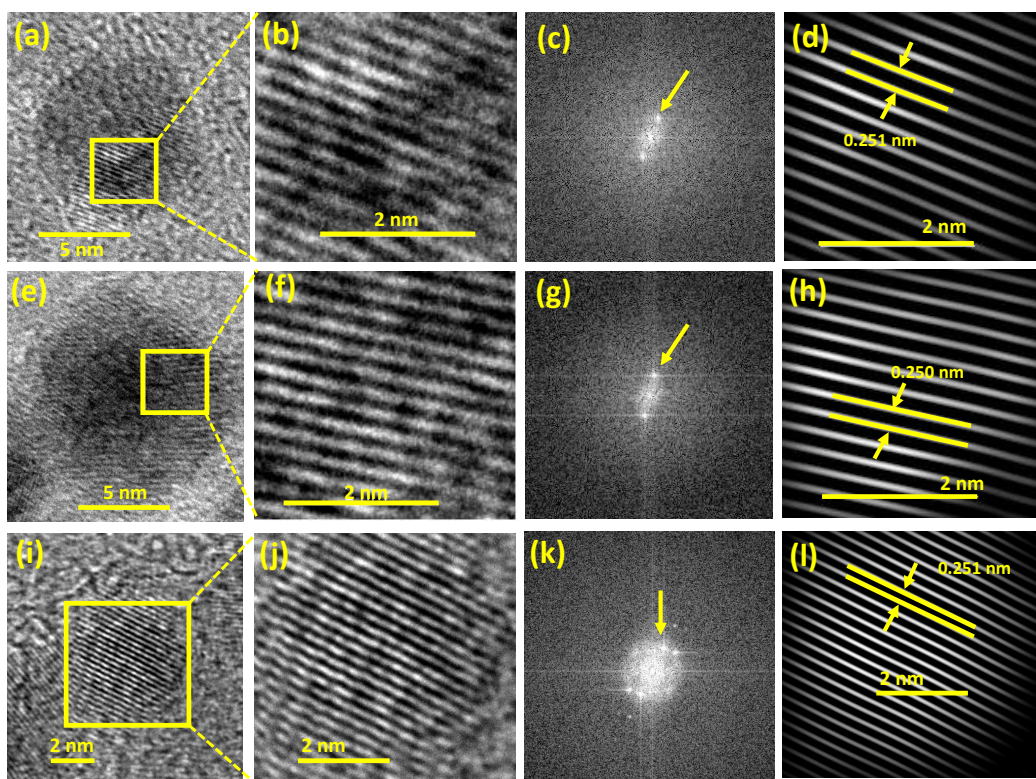

Fig. S1 (a), (e) and (i) HRTEM images of nanoparticle. (b), (f) and (j) enlarged images with visible fringe pattern. (c), (g) and (k) FFTs of the HRTEM images. The distinct frequency component (corresponding to the fringe), as indicated by the yellow arrow, is chosen for each image to generate a clear IFFT image, as shown in (d), (h), and (l), respectively.

## 5 The d-spacings calculated from obtained SAED pattern

Table S4 d-spacings calculated from obtained SAED pattern

| ring no. | d (nm) | hkl                    |
|----------|--------|------------------------|
| ring 1   | 0.243  | 111(Cu <sub>2</sub> O) |
| ring 2   | 0.207  | 111(Cu)                |
| ring 3   | 0.182  | 002(Cu)                |
| ring 4   | 0.154  | 022(Cu <sub>2</sub> O) |
| ring 5   | 0.131  | 013(Cu <sub>2</sub> O) |
| ring 6   | 0.113  | 123(Cu <sub>2</sub> O) |

## 6 Structure of congo red dye molecule

The structure of the Congo red dye molecule is represented in figure below (reference taken from Sigma Aldrich, CAS Number: 573-58-0).

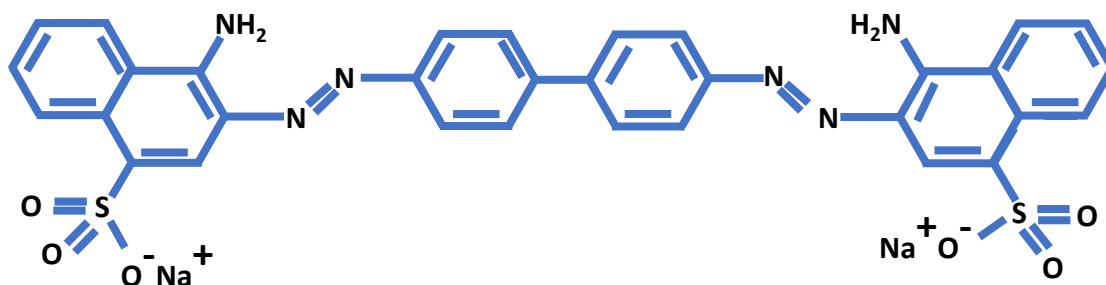

Fig. S2 congo red molecule structure.

## 7 Assignment of Raman peaks for Congo red dye<sup>5</sup>

Table S5 Raman peak assignment for congo red dye

| Raman peak position           | Assignment                         |
|-------------------------------|------------------------------------|
| peak 1: 1593 cm <sup>-1</sup> | phenyl ring                        |
| peak 2: 1452 cm <sup>-1</sup> | -N=N- stretching                   |
| peak 3: 1351 cm <sup>-1</sup> | Naphthyl ring                      |
| peak 4: 1152 cm <sup>-1</sup> | phenyl-N <sub>AZO</sub> stretching |

## 8 Previously reported work on SERS analysis of different analyte molecules using Cu or Au/Ag/Cu@Cu<sub>2</sub>O nanoparticles

Table S6 A short summary of previously reported work on SERS analysis of different analyte molecules using Cu or Au/Ag/Cu@Cu<sub>2</sub>O nanoparticle

| ref.                              | Nanoparticle                                | particle size & structure              | analyte molecule                  | laser source/ analyte concentration, EF                                                                                        |
|-----------------------------------|---------------------------------------------|----------------------------------------|-----------------------------------|--------------------------------------------------------------------------------------------------------------------------------|
| rawat et al. <sup>6</sup>         | Cu in ethylene glycol                       | 3.2-4.3 nm                             | Methylene blue                    | 514 and 785 nm                                                                                                                 |
| Baruah et al. <sup>7</sup>        | Cu                                          | 12-13 nm                               | karanjin seed                     | -                                                                                                                              |
| Muniz-miranda et al. <sup>8</sup> | Cu                                          | -                                      | phen and bipy                     | 514 and 785 nm                                                                                                                 |
| Wang et al. <sup>9</sup>          | Cu, Cu <sub>2</sub> O, Cu@Cu <sub>2</sub> O | nanodendrites                          | 4- aminobenzenethiol              | 532 and 633 nm                                                                                                                 |
| Chen et al. <sup>10</sup>         | Ag@Cu <sub>2</sub> O                        | 31 nm shell thickness                  | 4-MBA (mercaptobenzoic acid)      | 10 <sup>-3</sup> M to 10 <sup>-7</sup> M                                                                                       |
| Chen et al. <sup>11</sup>         | Au@Cu <sub>2</sub> O                        | 20 nm core & 48-108 nm shell thickness | MBA (mercaptobenzoic acid)        | 633 nm(laser power: 1 mW) , 10 <sup>-3</sup> M                                                                                 |
| Aghdam et al. <sup>12</sup>       | Cu@Cu <sub>2</sub> O                        | 40 nm                                  | methylene blue and crystal violet | 532 nm, 10 <sup>-3</sup> M to 10 <sup>-7</sup> M, EF=1.1 × 10 <sup>5</sup> and 7.5×10 <sup>5</sup> for the CV and MB molecules |

## 9 A comparison of XPS Cu 2p Analysis from Cu, Cu<sub>2</sub>O and Cu@Cu<sub>2</sub>O NPs prepared by different methods in literature with our results

Table S7 A short summary of previously reported work on XPS Cu 2p Analysis from Cu, Cu<sub>2</sub>O and Cu@Cu<sub>2</sub>O

| ref.                        | Cu 2p <sub>3/2</sub> peak position (eV)        | Cu 2p <sub>1/2</sub> peak position (eV) | O 1s peak position (eV) | compound                 |
|-----------------------------|------------------------------------------------|-----------------------------------------|-------------------------|--------------------------|
| Tahir et al. <sup>13</sup>  | 932.5 (Cu <sub>2</sub> O) and 932.6 (Cu)       | -                                       | 530.8                   | Cu <sub>2</sub> O and Cu |
| Yang et al. <sup>14</sup>   | 932.3                                          | 952.5                                   | 530                     | Cu@Cu <sub>2</sub> O     |
| Younan et al. <sup>15</sup> | 932.5 (Cu <sub>2</sub> O) and 932.6/932.7 (Cu) | -                                       | -                       | Cu <sub>2</sub> O and Cu |
| Mao et al. <sup>16</sup>    | 932.3                                          | 952.2                                   | -                       | Cu <sub>2</sub> O/Cu     |
| Ai et al. <sup>17</sup>     | 932.6                                          | 953.1                                   | -                       | Cu@Cu <sub>2</sub> O     |
| Our work                    | 932.5                                          | 952.5                                   | 531.2                   | Cu@Cu <sub>2</sub> O     |

## References

- 1 S. Shiravand and F. Azarbani, *Green Chemistry Letters and Reviews*, 2017, **10**, 241–249.
- 2 K.-t. Chen, D. Ray, Y.-h. Peng and Y.-C. Hsu, *Current Applied Physics*, 2013, **13**, 1496–1501.
- 3 R. Dobrucka and J. Dlugaszewska, *Saudi pharmaceutical journal*, 2018, **26**, 643–650.
- 4 G. Sun, S. Jia, X. Zhang, Z. Kang, M. Cui, B. Wang, B. Wang and D.-P. Yang, *ACS Applied Nano Materials*, 2021, **4**, 9831–9841.
- 5 C. E. Bonancêa, G. M. do Nascimento, M. L. De Souza, M. L. Temperini and P. Corio, *Applied Catalysis B: Environmental*, 2006, **69**, 34–42.
- 6 R. Rawat, A. Tiwari, M. K. Singh, R. Mandal, A. Pathak and A. Tripathi, *Radiation Effects and Defects in Solids*, 2020, **175**, 332–341.
- 7 P. K Baruah, A. Singh, I. Jahan, L. Rangan, A. N Panda, A. K Sharma and A. Khare, *Advanced Materials Letters*, 2017, **8**, 971–976.
- 8 M. Muniz-Miranda, C. Gellini and E. Giorgetti, *The Journal of Physical Chemistry C*, 2011, **115**, 5021–5027.
- 9 R.-C. Wang and C.-H. Li, *Acta materialia*, 2011, **59**, 822–829.

- 10 L. Chen, H. Sun, Y. Zhao, Y. Zhang, Y. Wang, Y. Liu, X. Zhang, Y. Jiang, Z. Hua and J. Yang, *RSC advances*, 2017, **7**, 16553–16560.
- 11 L. Chen, F. Zhang, X.-Y. Deng, X. Xue, L. Wang, Y. Sun, J.-D. Feng, Y. Zhang, Y. Wang and Y. M. Jung, *Spectrochimica Acta Part A: Molecular and Biomolecular Spectroscopy*, 2018, **189**, 608–612.
- 12 H. D. Aghdam, S. M. Bellah and R. Malekfar, *Spectrochimica Acta Part A: Molecular and Biomolecular Spectroscopy*, 2019, **223**, 117379.
- 13 D. Tahir and S. Tougaard, *Journal of physics: Condensed matter*, 2012, **24**, 175002.
- 14 X. Yang, J. Cheng, X. Yang, Y. Xu, W. Sun and J. Zhou, *Chemical Engineering Journal*, 2022, **431**, 134171.
- 15 H. Younan, S. Yue, L. Kai, W. J. Yuan, C. Y. Shen, C. Yixin, F. Chao and L. Xiaomin, 2016 IEEE 37th International Electronics Manufacturing Technology (IEMT) & 18th Electronics Materials and Packaging (EMAP) Conference, 2016, pp. 1–2.
- 16 P. Mao, L. Qi, X. Liu, Y. Liu, Y. Jiao, S. Chen and Y. Yang, *Journal of hazardous materials*, 2017, **328**, 21–28.
- 17 Z. Ai, L. Zhang, S. Lee and W. Ho, *The Journal of Physical Chemistry C*, 2009, **113**, 20896–20902.
